# Supplementary material for: In Vivo Repair of a Protein Underlying a Neurological Disorder by Programmable RNA Editing
Source: PubMed Central journal article supplement — Cell Rep. Author manuscript; Available in PMC 2020 Aug 26. (PMC7449137; doi:10.1016/j.celrep.2020.107878), 2020-07-14
Supplement: NIHMS1612482-supplement-2.pdf [file NIHMS1612482-supplement-2.pdf]

# In Vivo Repair of a Protein Underlying a Neurological Disorder by Programmable RNA Editing

## Graphical Abstract

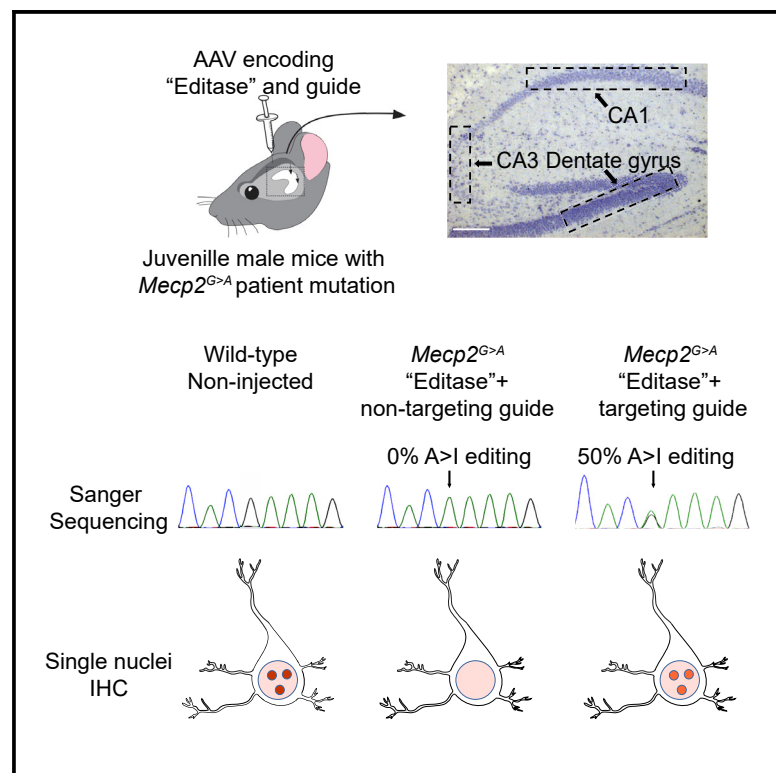

## Authors

John R. Sinnamon, Susan Y. Kim, Jenna R. Fisk, ..., Sophia Jeng, Shannon K. McWeeney, Gail Mandel

## Correspondence

mandelg@ohsu.edu

## In Brief

Sinnamon et al. show that the *Mecp2* guide-targeted "editase," introduced by an adeno-associated virus into the hippocampus of a Rett syndrome mouse model, repairs a large fraction of pathological *Mecp2*<sup>G>A</sup> RNA. MeCP2 function, visualized by chromatin association in neurons, is repaired to similar levels. The results point toward a potential therapy for Rett syndrome.

## Highlights

- Programmable RNA editing to repair neurological disease lacks *in vivo* evidence
- A guide-programmed "editase" tests RNA editing in mice with a human *MECP2*<sup>G>A</sup> mutation
- Editing repairs the *Mecp2* RNA mutation and protein function across neuronal types
- Off-target but not on-target editing increases with increased editase levels

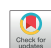

## Report

# In Vivo Repair of a Protein Underlying a Neurological Disorder by Programmable RNA Editing

John R. Sinnamon,<sup>1</sup> Susan Y. Kim,<sup>1,4</sup> Jenna R. Fisk,<sup>1</sup> Zhen Song,<sup>2,4</sup> Hiroyuki Nakai,<sup>2</sup> Sophia Jeng,<sup>3</sup> Shannon K. McWeeney,<sup>3</sup> and Gail Mandel<sup>1,5,\*</sup>

<sup>1</sup>Vollum Institute, Oregon Health and Science University, Portland, OR 97239, USA

<sup>2</sup>Department of Molecular and Medical Genetics, Oregon Health and Science University, Portland, OR 97239, USA

<sup>3</sup>Division of Bioinformatics and Computational Biology, Department of Medical Informatics and Clinical Epidemiology, Knight Cancer Institute, Oregon Health and Science University, Portland, OR 97239, USA

<sup>4</sup>Present address: Universal Cells, Inc., Seattle, WA, USA, 98121

<sup>5</sup>Lead Contact

\*Correspondence: [mandelg@ohsu.edu](mailto:mandelg@ohsu.edu)

<https://doi.org/10.1016/j.celrep.2020.107878>

## SUMMARY

Programmable RNA editing is gaining momentum as an approach to repair mutations, but its efficiency in repairing endogenous mutant RNA in complex tissue is unknown. Here we apply this approach to the brain and successfully repair a guanosine-to-adenosine mutation in methyl CpG binding protein 2 RNA that causes the neurodevelopmental disease Rett syndrome. Repair is mediated by hippocampal injections of juvenile *Mecp2*<sup>317G>A</sup> mice with an adeno-associated virus expressing the hyperactive catalytic domain of adenosine deaminase acting on RNA 2 and *Mecp2* guide. After 1 month, 50% of *Mecp2* RNA is recoded in three different hippocampal neuronal populations. MeCP2 protein localization to heterochromatin is restored in neurons to 50% of wild-type levels. Whole-transcriptome RNA analysis of one neuronal population indicates that the majority of off-target editing sites exhibit rates of 30% or less. This study demonstrates that programmable RNA editing can be utilized to repair mutations in mouse models of neurological disease.

## INTRODUCTION

Adenosine deaminase enzymes catalyze the hydrolytic deamination of adenosine to inosine in RNA (A-to-I RNA editing) (Bass and Weintraub, 1987, 1988; Kim et al., 1994; Melcher et al., 1996; O'Connell et al., 1998). Inosine is generally treated as guanosine by the translational machinery (Basilio et al., 1962; Hoernes et al., 2018; Licht et al., 2019), resulting in codon changes with important consequences for protein function, particularly in the nervous system (Bhalla et al., 2004; Burns et al., 1997; Sommer et al., 1991). Two catalytically active adenosine deaminase acting on RNA enzymes, ADAR1 and ADAR2, are expressed at high levels in the CNS (Tan et al., 2017). The native proteins are recruited to their natural target RNAs, which can be overlapping or unique to each molecule (Burns et al., 1997; Maas et al., 1996; Melcher et al., 1996; Yang et al., 1997), by intrinsic domains that recognize double-stranded RNA (Kim et al., 1994; Melcher et al., 1996). Several pioneering studies have paved the way for programmable A-to-I editing of exogenous RNAs by harnessing the deaminase domains of ADAR1 or ADAR2 (Montiel-Gonzalez et al., 2013; Stafforst and Schneider, 2012; Woolf et al., 1995). Many of these studies utilized fusions of the ADAR deaminase domain with a heterologous RNA binding protein (for example, Cas13 or the bacteriophage  $\lambda$ N peptide) with a RNA guide specific for the target RNA substrate (Cox et al., 2017; Katrekar et al., 2019; Montiel-

Gonzalez et al., 2013, 2019; Montiel-González et al., 2016; Schneider et al., 2014; Sinnamon et al., 2017; Vogel et al., 2018). Endogenous RNAs have been repaired by programmable RNA editing in cell lines and primary cells (Cox et al., 2017; Merkle et al., 2019; Sinnamon et al., 2017; Vogel et al., 2018).

A recent study has demonstrated repair in mouse models of Duchenne muscular dystrophy and ornithine transcarbamylase deficiency (Katrekar et al., 2019), establishing the utility of this approach for muscle and the liver. However, both of these tissues have the advantage of relative cellular homogeneity. The large cellular complexity in the CNS raises the question of whether RNA structure and RNA binding proteins in different cell types will create a more or less accessible transcript for RNA repair by programmable editing. Therefore, direct tests in a mouse model of neurological disease are clearly warranted.

Mouse models of Rett syndrome are ideally suited to test the efficacy of programmable RNA editing *in vivo*. Rett syndrome is caused by *de novo* loss-of-function mutations in the gene encoding the X-linked transcriptional regulator MECP2 (Amir et al., 1999). MeCP2 pathological mutations result primarily in a neurological phenotype characterized in females by regression of speech and purposeful hand motions and the appearance of seizures and respiratory abnormalities (Neul et al., 2010). MeCP2 is expressed in most, if not all, neurons and glia (Ballas et al., 2009; Lioy et al., 2011; Rakela et al., 2018; Shahbazian et al., 2002; Skene et al., 2010), and previous studies have indicated that

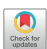

these cells can be targeted throughout the brain and spinal cord by adeno-associated virus 9 (AAV9) for facile analyses (Gadalla et al., 2013, 2017; Garg et al., 2013; Mendell et al., 2017; Sinnott et al., 2017). Importantly, a database of mutations causing Rett syndrome (Fyfe et al., 2003) indicates that 36% are caused by G>A mutations or C>T mutations that create opal stop codons, raising the possibility that adenosine deamination in these contexts may repair MeCP2 protein function. We previously generated a mouse line in which the mouse *Mecp2* gene contained the human patient mutation *MECP2*<sup>317G>A</sup> (R106Q) (Sinnamon et al., 2017). This mutation, resulting in Rett syndrome, is located in the DNA binding domain. Consequently, MeCP2 protein becomes unstable and has a greatly reduced ability to bind to chromatin (Kudo et al., 2003; Sinnamon et al., 2017; Yang et al., 2016), easily quantifiable metrics for recovery of protein function.

We previously showed repair of *Mecp2*<sup>317G>A</sup> RNA and stabilization and chromatin binding of MeCP2 protein in neurons cultured from these mice. The neurons were infected with an AAV bearing a fusion between a mutated hyperactive ADAR2 deaminase domain and the bacteriophage λN peptide (“editase”; Montiel-Gonzalez et al., 2013). A nuclear localization signal had also been added to the editase to increase nuclear editing efficiency (Sinnamon et al., 2017; Vallecillo-Viejo et al., 2018). The editase was targeted to *Mecp2* RNA with a guide that also included a sequence recognized by the bacteriophage λN peptide (Sinnamon et al., 2017). Despite efficient editing in primary neurons, whether the virus could deliver sufficient amounts of editase *in vivo*, whether different neuronal types would be equally accessible to directed RNA editing, and the extent of off-target editing remained open questions.

Here, using a Rett syndrome mouse model, we determine whether mutant *Mecp2* RNA, in distinct neuronal subpopulations in the postnatal mouse brain, is accessible to programmable RNA repair and whether MeCP2 protein function is also restored. We also determine the on- and off-target editing landscape in one of these populations of neurons by whole-transcriptome analysis.

## RESULTS

### On- and Off-Target Editing Analyses of *Mecp2* RNA

Six copies of a *Mecp2* targeting guide or a non-targeting guide (Table S1) were cloned downstream of the U6 small nuclear RNA polymerase III promoter and upstream of the editase. The *Mecp2* guide (Table 1) is complementary to *Mecp2* RNA and contains two copies of the BoxB hairpin recognized by the λN RNA binding domain as well as an A-C mismatch at the target adenosine to increase editing efficiency (Källman et al., 2003; Schneider et al., 2014; Sinnamon et al., 2017; Wong et al., 2001). The guide also contains an additional A-G mismatch located 3 nt upstream of the target adenosine to diminish off-target editing at this site (Schneider et al., 2014; Sinnamon et al., 2017).

Because the target adenosine in *Mecp2*<sup>317G>A</sup> is not in an ideal sequence context for ADAR2 editing (Eggington et al., 2011), we utilized a version of the editase that contains a mutation in the deaminase domain, E488Q, that results in hyperactivity (Kuttan and Bass, 2012; Sinnamon et al., 2017). The non-targeting guide

lacks the BoxB RNA hairpins as well as any *Mecp2* sequences. The hemagglutinin (HA) epitope-tagged editase<sup>E488Q</sup> was placed under control of the human *Synapsin I* promoter to direct expression to neurons after stereotactic injection of the viruses (Figure 1A). We produced AAV vectors expressing each component by packaging these expression cassettes into the AAV PHP.B capsid.

We first established expression of the editase by immunohistochemistry for the HA epitope tag after stereotaxic injection of both vectors into the hippocampus. We observed editase expression from both vectors in the major neuronal populations of the hippocampus (Figures 1B and 1C). We then determined on- and off-target A-to-I editing rates within *Mecp2* by Sanger sequencing analysis. RNA was isolated from the intact hippocampus as well as from different subpopulations of hippocampal neurons (CA1, CA3, and dentate gyrus) isolated by laser capture micro-dissection from each of three mice. In the isolated intact hippocampus, we measured 35% ± 7% A-to-I editing at the target adenosine with the *Mecp2* guide, with negligible editing observed with the non-targeting guide (Figure 2A).

Remarkably, when cDNA was prepared from the individual hippocampal neuronal populations, the mean editing rates at the target adenosine varied only minimally, between 49% and 52% (dentate gyrus [DG], 49% ± 9%; CA1, 52% ± 12%; CA3, 49% ± 7%). Editing was again negligible with the non-targeting guide (Figure 2B). External to the guide region, no off-target sites were detected within the *Mecp2* transcript. Within the guide region, we detected five bystander off-target editing sites, only one of which (E102E) was consistently edited at rates above background across neuronal populations and individual mice (18%–65%; Table 1). The bystander site that contained an A-G mismatch in the guide, T105T, based on our previous work, showed only minimal editing over our 5% background (DG, 6% ± 4%; CA1, 4% ± 3%; CA3, 10% ± 2%). These results demonstrate the efficacy of adding mismatches to diminish bystander editing efficiency *in vivo* as well as *in vitro* (Schneider et al., 2014; Sinnamon et al., 2017). We addressed the question of off-target editing rates in the wild-type allele because female Rett syndrome models are mosaic for wild-type and mutant cells. For this purpose, we injected the hippocampus of a wild-type mouse, where all cells have the wild-type allele, with the same virus used for the mutant mice (Table S2). We found very similar bystander sites and rates in these injected mice, with no other off-target editing within the rest of the *Mecp2* transcript. This result suggests that off-target editing will be similar between the wild-type and mutant *Mecp2* alleles in females, but it needs to be tested formally in female Rett syndrome mice in future studies.

Because the editing rates were so similar among the different neuronal populations, we next performed a whole-transcriptome RNA sequencing (RNA-seq) analysis on one of the neuronal populations, DG, to determine A-to-I on- and off-target editing rates (Figure 3). Whole-exome sequencing was also performed on the same samples. Single-nucleotide polymorphisms and edited sites in the non-injected control samples, presumably reflecting endogenous ADAR activity, were removed from the results presented here. Importantly, the on-target and off-target editing rates within the guide region matched those from our Sanger sequencing analysis using the same RNA. Additionally, editing

**Table 1. Editing of Adenosines within *Mecp2* RNA Identified by Sanger Sequencing Analysis**

| DG  | Replicate | Injection Condition                      | E102G | E102E | T105A | T105T | R106Q <sup>a</sup> | K107R |
|-----|-----------|------------------------------------------|-------|-------|-------|-------|--------------------|-------|
|     | 1         | 6xU6-Mecp2 targeting guide-hSynI editase | ND    | 44.5% | ND    | ND    | 39.4%              | ND    |
|     | 2         | 6xU6-Mecp2 targeting guide-hSynI editase | 10.2% | 41.3% | 15.3% | 9.4%  | 57.9%              | 9.6%  |
|     | 3         | 6xU6-Mecp2 targeting guide-hSynI editase | 7.8%  | 39.2% | 8.3%  | ND    | 49.7%              | ND    |
|     | 1         | 1xU6-non-targeting guide-hSynI editase   | ND    | ND    | ND    | ND    | ND                 | ND    |
|     | 2         | 1xU6-non-targeting guide-hSynI editase   | ND    | ND    | ND    | ND    | ND                 | ND    |
|     | 3         | 1xU6-non-targeting guide-hSynI editase   | ND    | ND    | ND    | ND    | ND                 | ND    |
| CA1 | Replicate | Injection Condition                      | E102G | E102E | T105A | T105T | R106Q <sup>a</sup> | K107R |
|     | 1         | 6xU6-Mecp2 targeting guide-hSynI editase | 5.8%  | 64.7% | ND    | ND    | 63.9%              | 64.7% |
|     | 2         | 6xU6-Mecp2 targeting guide-hSynI editase | ND    | 24.4% | 6%    | ND    | 39.6%              | ND    |
|     | 3         | 6xU6-Mecp2 targeting guide-hSynI editase | ND    | 18.3% | ND    | ND    | 52.4%              | ND    |
|     | 1         | 1xU6-non-targeting guide-hSynI editase   | ND    | ND    | ND    | ND    | ND                 | ND    |
|     | 2         | 1xU6-non-targeting guide-hSynI editase   | ND    | ND    | ND    | ND    | ND                 | ND    |
|     | 3         | 1xU6-non-targeting guide-hSynI editase   | ND    | ND    | ND    | ND    | ND                 | ND    |
| CA3 | Replicate | Injection Condition                      | E102G | E102E | T105A | T105T | R106Q <sup>a</sup> | K107R |
|     | 1         | 6xU6-Mecp2 targeting guide-hSynI editase | 5.9%  | 38%   | 16.3% | 8.4%  | 41%                | 6.2%  |
|     | 2         | 6xU6-Mecp2 targeting guide-hSynI editase | 9.3%  | 39.6% | 18.9% | 12.1% | 54.9%              | 12.9% |
|     | 3         | 6xU6-Mecp2 targeting guide-hSynI editase | 7.5%  | 26.8% | 12.7% | 9.8%  | 49.7%              | ND%   |
|     | 1         | 1xU6-non-targeting guide-hSynI editase   | ND    | ND    | ND    | ND    | ND                 | ND    |
|     | 2         | 1xU6-non-targeting guide-hSynI editase   | ND    | ND    | ND    | ND    | ND                 | ND    |
|     | 3         | 1xU6-non-targeting guide-hSynI editase   | ND    | ND    | ND    | ND    | ND                 | ND    |

Top: *Mecp2* mRNA and the deduced primary amino acid sequence (top row) relative to the guide RNA (bottom row). x, mismatched adenosines. Bottom: rates of editing at the adenosines located within the guide region for each biological replicate. The detection limit for this assay was determined previously to be 5% editing (Sinnamon et al., 2017). Any sites that had 5% or less editing are listed as having no detectable editing (ND). There was no detectable editing in *Mecp2* RNA outside of the guide region.

<sup>a</sup>The target adenosine, *Mecp2*<sup>317</sup> in the RNA strand (MeCP2<sup>R106Q</sup>).

sites were not detected anywhere in the *Mecp2* RNA in mice infected with the non-targeting guide virus. These results support our RNA-seq bioinformatics pipeline.

### Global Off-Target Analysis

We identified 2,984 off-target sites from mice injected with the *Mecp2* targeting guide virus and 909 off-target sites from mice injected with the non-targeting guide virus. The off-target sites under both conditions were distributed throughout the primary transcript (Figure 3A). When the number of sites and the percentages of A-to-I editing were considered for targeting and non-targeting guides, a majority (70% and 84%, respectively) represented editing at rates of 30% or less (Figure 3B). Consistent with a previous study (Cox et al., 2017), we found that nearly all (97%) of the off-target sites under the non-targeting condition were included in the sites under the *Mecp2* targeting condition and that off-target editing was influenced by editase levels (Figures 3B and 3C). To confirm that on-target editing of *Mecp2* RNA was guide dependent and independent of

editase levels, we performed a new RNA-seq analysis on the same RNA from our previous neuronal culture study (Sinnamon et al., 2017), where, fortuitously, the editase level was higher in cells infected with the non-targeting virus (Figure S1A). Despite the higher editase levels under the non-targeting condition, there was no on-target editing without the *Mecp2* targeting guide (Figure S1B). Further, off-target editing was influenced by the editase expression level (Figure S1C). The U6 promoter number did not influence editase protein levels in the transfection analysis, suggesting that variability in editase levels in neuronal cultures and *in vivo* reflect variability in viral infection parameters (Figure S2).

### Repair of MeCP2 Protein Function

The *Mecp2*<sup>317G>A</sup> mutation destabilizes MeCP2 protein *in vitro* (Sinnamon et al., 2017; Yang et al., 2016) and *in vivo* (Figures 4A–4C) and results in greatly diminished binding to methylated DNA (Kudo et al., 2003; Sinnamon et al., 2017; Yang et al., 2016). We wanted to find out, at the single-cell level, whether

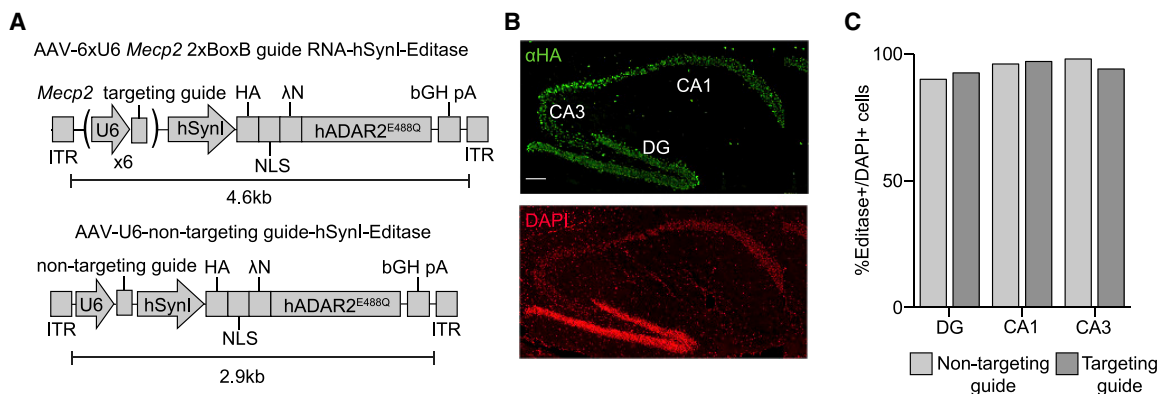

**Figure 1. Hippocampal Expression of RNA Editing Components following Stereotaxic Injection of *Mecp2*<sup>317G>A</sup> Mice**

(A) Schematic of AAV editase expression vectors. Each construct contains the human *Synapsin 1* promoter for neuronal editase expression and either six individual U6 promoters, each driving expression of one copy of the *Mecp2* 2xBoxB targeting guide (top) or a single human U6 promoter driving expression of a small non-targeting RNA (bottom).

(B) Confocal images of a *Mecp2*<sup>317G>A</sup> mouse 3 weeks after hippocampal injection of the AAV PHP.B vector. HA immunostaining identifies the editase in the dentate gyrus (DG) and CA1 and CA3 pyramidal neuronal layers. Scale bar, 100  $\mu$ m.

(C) Quantification of HA-editase-positive cells for each virus relative to the total number of cells in each region (mean, n = 2 mice per condition). More than 100 cells were counted per hippocampal region per replicate.

the broadly distributed off-target editing sites we detected would prevent MeCP2 protein function; for example, by causing further destabilization, altering chromatin, or preventing nuclear entry. Because MeCP2 binds to methylated DNA that is enriched in mouse satellite sequences in the pericentromeric heterochromatin, enrichment in heterochromatin has been an *in vivo* proxy for MeCP2 DNA binding ability (Brown et al., 2016; Heckman et al., 2014). Therefore, we used confocal microscopy to quantitate the enrichment of MeCP2 within regions of interest in neuronal heterochromatin foci in the hippocampus of two *Mecp2*<sup>317G>A</sup> mice for each viral condition (STAR Methods). Two non-injected wild-type mice were used as controls. We analyzed the same fields—CA1, CA3, and DG—that were used for Sanger sequencing analyses (Figure 2B). Neither the number of DAPI-labeled heterochromatin puncta per nucleus nor the average size of heterochromatic puncta was altered between virus-infected and wild-type nuclei. In all fields, for CA3 and DG sections, both mice infected with a virus expressing the *Mecp2* targeting guide showed heterochromatic enrichment of MeCP2 protein (see Figures 4A and 4D and 4C and 4F). Further, the amount of MeCP2 within heterochromatin relative to wild-type MeCP2 was nearly the same as the amount of on-target editing by Sanger and whole transcriptomic sequencing (compare Figures 4D and 4E and 2B). In contrast, in all neurons infected with the non-targeting virus, MeCP2 protein was destabilized and not enriched in heterochromatin (Figures 4A–4C).

Interestingly, one mouse injected with the *Mecp2* targeting virus did not show MeCP2 enrichment within the heterochromatin of CA1 neurons, although the editase was expressed and enrichment was robust in the CA3 and DG in the same mouse. This result is reflected in the bimodal distribution of heterochromatin-associated MeCP2 in the *Mecp2* targeting guide condition of CA1 neurons (Figures 4B and 4E). We cannot measure RNA repair and immunohistochemistry in the same mouse for technical reasons. However, the lack of functional MeCP2 in this

mouse may reflect the presence of a CA1-specific off-target site that was detected in one of the three additional injected mice that were tested for RNA editing by Sanger analysis (Table 1). The bystander off-target site was located 3 nt 3' of the target adenosine and recoded the codon from lysine to arginine. Because this change occurred in the DNA binding domain, it could potentially prevent binding of MeCP2 to chromatin, although it is not a mutation causing Rett syndrome (Fyfe et al., 2003). Perhaps the off-target editing event in CA1 detected by Sanger sequencing and the lack of MeCP2 enrichment in the heterochromatin of CA1 neurons were consequences of more virus being delivered to the CA1 region of those mice because of inconsistencies in injection placement. Regardless, because the off-target site was within the guide region, in future constructs the aberrant editing can be eliminated by adding an A:G mismatch at this site in the guide RNA (Sinnamon et al., 2017; Schneider et al., 2014), which we showed to be effective at the bystander off-target T105T in this study (Table 1).

## DISCUSSION

Genomic and RNA base editing are potential therapeutic approaches for treating human disease (Gaudelli et al., 2017; Komor et al., 2016; Montiel-Gonzalez et al., 2019). Genomic editing has been utilized to successfully repair a gene responsible for hearing loss in mice (Yeh et al., 2018). We focused on RNA base editing because it does not have the same sequence constraints as DNA base editing. Additionally, as shown here, rates of off-target editing are graded with programmable RNA editing (Figure 3; Cox et al., 2017; Vallecillo-Viejo et al., 2018). Earlier work has demonstrated the potential of site-directed RNA editing for treating human disease. For example, heterologous expression in *Xenopus* oocytes of an editase system repaired a chloride channel mutation underlying cystic fibrosis (Montiel-Gonzalez et al., 2013). More recently, recoding of a pathogenic

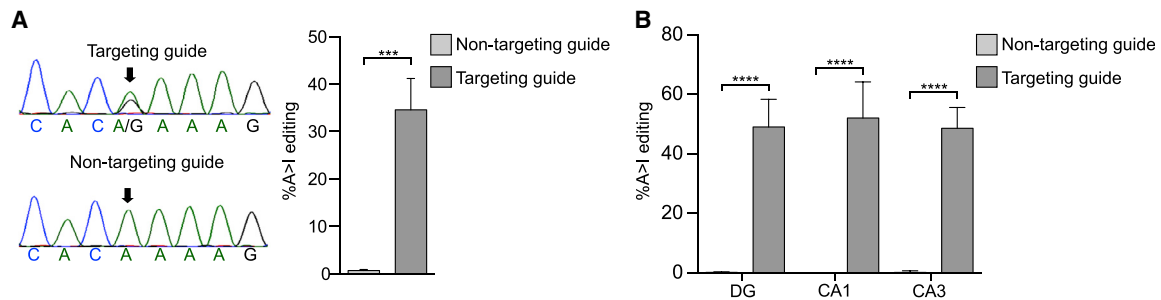

**Figure 2. Efficient Editing of *Mecp2* RNA following Hippocampal Injection of *Mecp2*<sup>317G>A</sup> Male Mice (Post-natal Day 28 [P28])**

(A) Left: sequencing chromatograms of cDNA from an intact hippocampus injected with the editase and the indicated guides 3 weeks after viral injection. An arrow denotes the on-target base. Right: quantification of editing (mean ± SD, n = 3 mice per condition). \*\*\*p < 0.01 unpaired two-tailed t test. (B) Quantification of editing in hippocampal neurons following laser capture micro-dissection. Mean ± SD, n = 3 mice/condition 3 weeks after viral injection. \*\*\*\*p < 0.001, one-way ANOVA and Tukey's multiple comparisons test.

mutation in PINK1, associated with Parkinson's disease, was achieved by full-length ADAR2-mediated editing in HeLa cells (Wettengel et al., 2017), and A-to-I and C-to-U recoding of 11 endogenous genes was achieved using an ADAR2-Cas13-guided system in HEK293 cells (Abudayyeh et al., 2019; Cox et al., 2017). A demonstration of successful *in vivo* RNA editing was published recently using G>A mutant mouse models of Duchenne muscular dystrophy and ornithine *in vivo* transcarbamylase deficiency (Katrekar et al., 2019). Our study demonstrates that *in vivo* programmable RNA editing can also efficiently edit target RNA in heterogeneous nervous tissue, resulting in functional repair of a patient mutation in mice representing a human neurological disease.

Importantly, and in contrast to the only other *in vivo* study of programmable editing, we also examine on- and off-target editing efficiencies *in vivo* in a tissue with cellular heterogeneity. Although on-target editing was efficient and fairly uniform among the three different neuronal populations, which differ anatomically and functionally, two types of off-target editing occurred: bystander, within the guide region, and transcriptome-wide. Within the guide region, we identified only one bystander off-target site that was edited consistently across the neuronal populations, but editing did not alter the amino acid (E102E). Given that an A:G mismatch at another bystander off-target site, T105T, significantly reduced the editing rate

*in vivo*, subsequent guides should include a mismatch at this site as well. Even though neither bystander off-target editing changed the amino acid, mismatches at these sites will have the benefit of preventing promiscuous inosine decoding (Hoernes et al., 2018; Licht et al., 2019), in the case that decoding also occurs at a reasonable frequency in non-dividing neurons, as reported for dividing cells. Regarding off-target editing within the whole transcriptome, as described previously (Cox et al., 2017; Katrekar et al., 2019; Vallecillo-Viejo et al., 2018), the hyperactive editase resulted in global off-target editing within neurons in the brain. Importantly, only off-target editing was dependent on the level of editase expression, consistent with a previous *in vitro* study (Cox et al., 2017). An advantage of this finding is that future experiments to evaluate rescue of Rett syndrome-like phenotypes in mice will result in lower levels of editase per cell because of peripheral virus delivery, which is necessary to infect the entire brain. Additionally, several groups are already beginning to identify editase molecules with higher specificity and efficiency (Cox et al., 2017; Monteleone et al., 2019) for *in vivo* testing.

Despite the off-target editing, the efficient on-target editing rates determined by Sanger and whole-transcriptome sequencing in neurons in this study were consistent with the amount of heterochromatin-associated MeCP2 estimated from our imaging experiments (compare Figures 4D–4F and 2B). Although the presence of

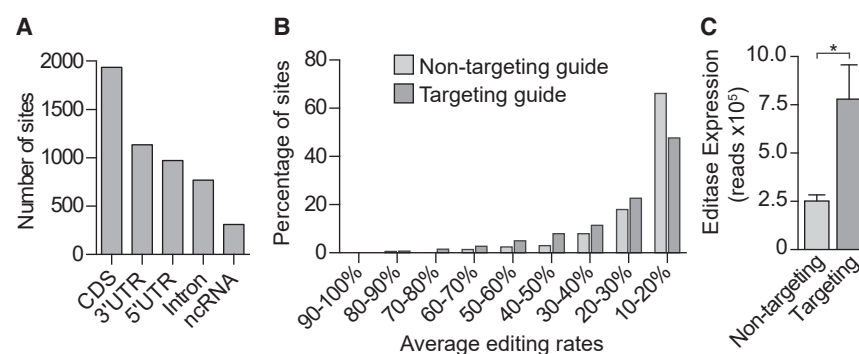

**Figure 3. Off-Target Editing Rates Determined by Whole-Transcriptome Analysis in the DG Are Graded and Depend on the Level of Editase Expression**

(A) Histogram showing the number of total off-target sites, independent of injection condition, located in coding sequences (CDSs), 3' untranslated regions (UTRs), 5' UTRs, and non-coding RNA (ncRNA). (B) Histogram showing the percentage of transcriptome-wide RNA editing sites, binned according to the average editing rates (n = 3 biological replicates). (C) Editase RNA-seq reads (mean ± SD, n = 3 mice/condition) that aligned to the editase CDS for each injection condition. \*p < 0.05, two-tailed unpaired t test.

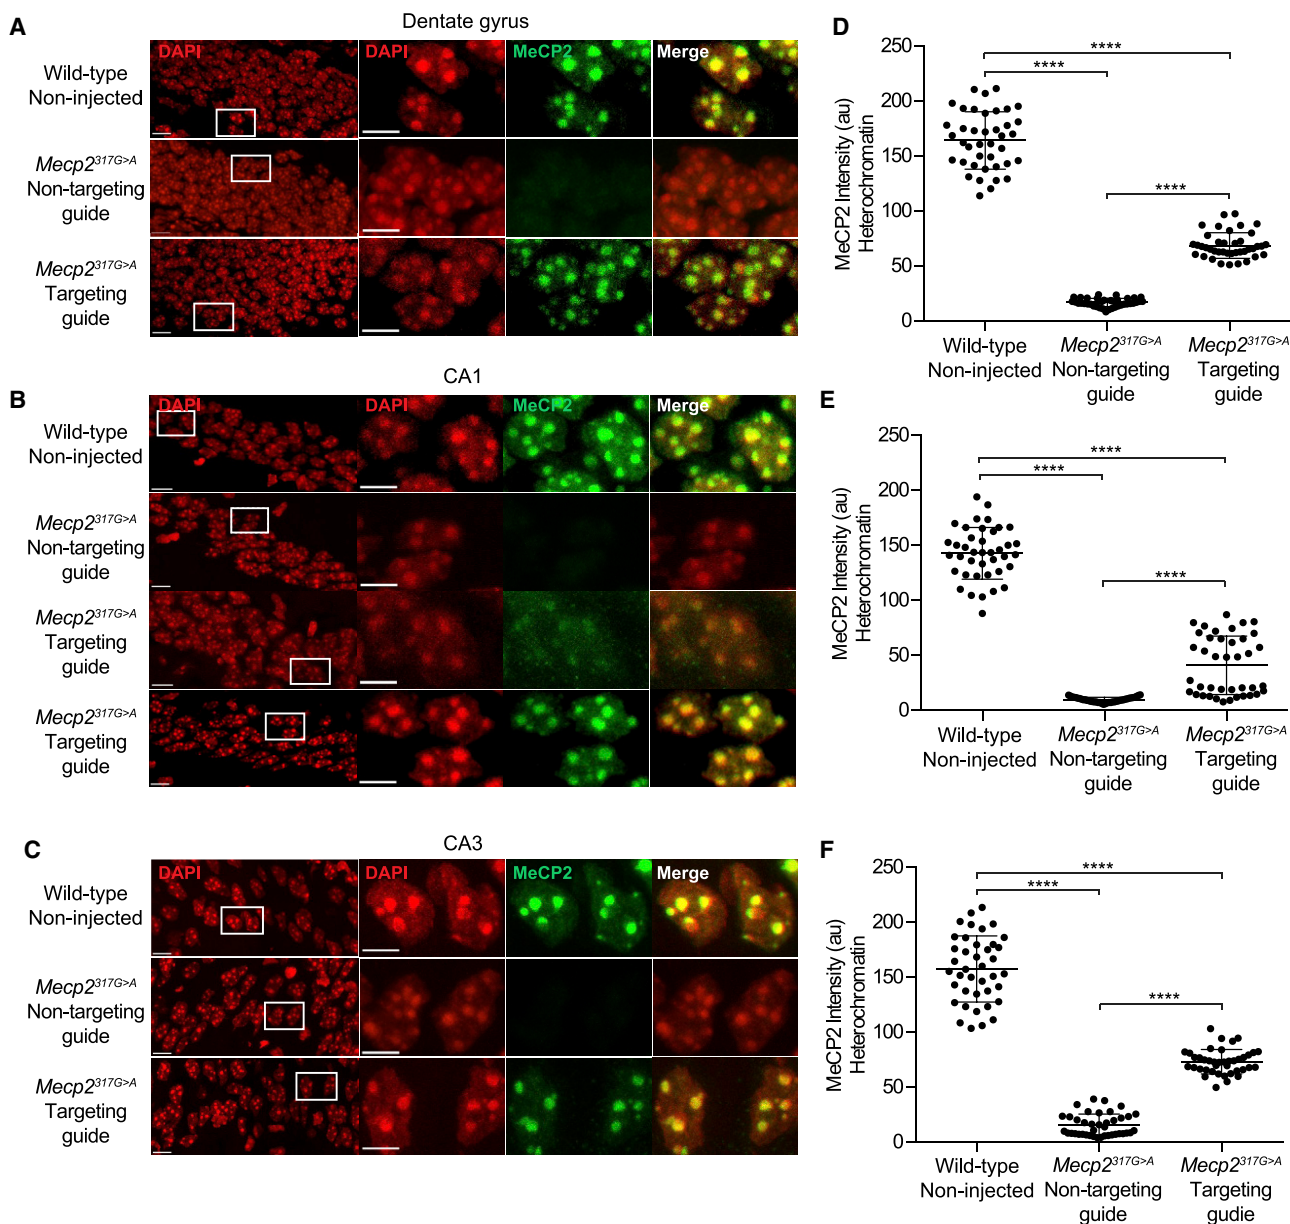

**Figure 4. Editase Programmable RNA Editing Restores the Ability of MeCP2 to Associate with Heterochromatin in *Mecp2*<sup>317G>A</sup> Mice**

(A–C) Confocal images of hippocampal neuronal nuclei immunolabeled for MeCP2. DAPI staining defines the nucleus and heterochromatic foci. Boxes enclose regions of higher magnification. Scale bars, 10  $\mu$ m for higher-power images and 5  $\mu$ m for lower-power images. All images were acquired at the same intensity measurements.

(D–F) Quantification of immunolabeled MeCP2 associated with heterochromatic foci (STAR Methods). Each dot represents a single cell (40 cells total from two mice).

(A) and (D) show dentate granule neurons. (B) and (E) show CA1 pyramidal neurons. (C) and (F) show CA3 pyramidal neurons. a.u., arbitrary units. \*\*\*\* $p < 0.0001$  by Kruskal-Wallis test and Dunn’s multiple comparisons test.

immunolabeled MeCP2 in heterochromatin is an indirect measurement of MeCP2 DNA binding ability, many previous studies have indicated that it is an excellent proxy based on comparisons with *in vitro* binding studies (Brown et al., 2016; Goffin et al., 2011; Heckman et al., 2014). We noted that the variability of MeCP2 heterochromatin association in mutant neurons in mice infected with

the *Mecp2* targeting guide was significantly less than that of native MeCP2 in wild-type neurons (DG,  $p < 0.0001$ ; CA1,  $p = 0.0025$ ; CA3  $p < 0.0001$ ). This result could reflect a still unidentified compensatory mechanism in the heterochromatin in mutants from loss of MeCP2 from inception, which reduces the accessible number of MeCP2 binding sites. Further studies examining

programmable editase:guide editing at earlier time points may shed light on this intriguing observation.

Our results showed a uniformity of 50% editing and a comparable association of MeCP2 protein with heterochromatin across several hippocampal neuronal subtypes. This result suggests that, using peripheral injections, neuronal populations across the brain should share a similar repair rate. With peripheral injections, comprehensive behavioral testing combined with quantitative measurements of MeCP2 protein function and gene expression are possible and will need to be performed in male and female Rett syndrome mouse models. How much repaired MeCP2 per cell is necessary and how many neuronal and glial cells need to be repaired to reverse Rett syndrome phenotypes in mice is not known. Previous reports indicate that the mouse and human nervous systems are very sensitive to the levels of MeCP2 expression (Kerr et al., 2008; Samaco et al., 2008), and even a 2-fold increase in MeCP2 levels results in a neurological phenotype (Collins et al., 2004; Van Esch et al., 2005). Thus, although it is unlikely that 50% repair per cell will result in a wild-type mouse, as evaluated by the above metrics, this level of repair may be reasonably expected to result in significant improvement in Rett syndrome-like phenotypes in treated mice, and, importantly, programmable editing will never lead to overexpression of MeCP2.

## STAR★METHODS

Detailed methods are provided in the online version of this paper and include the following:

- KEY RESOURCES TABLE
- RESOURCE AVAILABILITY
  - Lead Contact
  - Materials Availability
  - Data and Code Availability
- EXPERIMENTAL MODEL AND SUBJECT DETAILS
  - Animal studies
  - Cell lines
- METHOD DETAILS
  - Plasmid constructs
  - AAV vectors
  - Stereotaxic injections
  - Laser capture microdissection
  - Sanger sequencing analysis
  - Whole transcriptomic analysis
  - Immunostaining
  - Image Acquisition and Analysis
  - Transient Transfections and Cell Culture
  - Western Blotting
- QUANTIFICATION AND STATISTICAL ANALYSIS

## SUPPLEMENTAL INFORMATION

Supplemental Information can be found online at <https://doi.org/10.1016/j.celrep.2020.107878>.

## ACKNOWLEDGMENTS

We thank Christine Schmidt-Weber and Justine Nguyen for mouse husbandry, Joshua Rosenthal (Marine Biological Laboratories, MA) for help and advice

when applying the editase system to Rett syndrome, and James M. Wilson (University of Pennsylvania) for the p5E18-VD2/9 plasmid. Discussions and encouragement from people in the laboratories of Adrian Bird (Wellcome Trust Centre for Cell Biology, University of Edinburgh), Michael E. Greenberg (Harvard Medical School), and Paul Brehm (Vollum Institute, Oregon Health and Science University) are greatly appreciated. An NIH Director's Transformative Research award (NS087726) to G.M., Joshua Rosenthal, Paul Brehm and John Adelman, NIH R01 NS088399 (to H.N.), and grants from the Rett Syndrome Research Trust (to G.M. and J.R.S.) funded this work.

## AUTHOR CONTRIBUTIONS

J.R.S. and G.M. designed the research. J.R.S., S.Y.K., J.R.F., and Z.S. performed the research. H.N. provided AAV advice, virus, and analytic tools. S.J. and S.K.M. performed the bioinformatics analysis with suggestions from J.R.S. J.R.S., S.Y.K., S.J., S.K.M., and G.M. analyzed the data. J.R.S. and G.M. wrote the paper, which was edited by all authors.

## DECLARATION OF INTERESTS

G.M. is a scientific co-founder of Vico Therapeutics. She holds equity but is not an employee, and her laboratory receives no Vico funding. G.M. and J.R.S. are co-inventors on provisional patent application PCT/US18/55029 filed by Oregon Health and Science University.

Received: February 24, 2020

Revised: May 8, 2020

Accepted: June 16, 2020

Published: July 14, 2020

## REFERENCES

- Abudayyeh, O.O., Gootenberg, J.S., Franklin, B., Koob, J., Kellner, M.J., Ladha, A., Joung, J., Kirchgatterer, P., Cox, D.B.T., and Zhang, F. (2019). A cytosine deaminase for programmable single-base RNA editing. *Science* 365, 382–386.
- Amir, R.E., Van den Veyver, I.B., Wan, M., Tran, C.Q., Francke, U., and Zoghbi, H.Y. (1999). Rett syndrome is caused by mutations in X-linked MECP2, encoding methyl-CpG-binding protein 2. *Nat. Genet.* 23, 185–188.
- Ballas, N., Liyo, D.T., Grunseich, C., and Mandel, G. (2009). Non-cell autonomous influence of MeCP2-deficient glia on neuronal dendritic morphology. *Nat. Neurosci.* 12, 311–317.
- Basilio, C., Wahba, A.J., Lengyel, P., Speyer, J.F., and Ochoa, S. (1962). Synthetic polynucleotides and the amino acid code. *V. Proc. Natl. Acad. Sci. USA* 48, 613–616.
- Bass, B.L., and Weintraub, H. (1987). A developmentally regulated activity that unwinds RNA duplexes. *Cell* 48, 607–613.
- Bass, B.L., and Weintraub, H. (1988). An unwinding activity that covalently modifies its double-stranded RNA substrate. *Cell* 55, 1089–1098.
- Bhalla, T., Rosenthal, J.J., Holmgren, M., and Reenan, R. (2004). Control of human potassium channel inactivation by editing of a small mRNA hairpin. *Nat. Struct. Mol. Biol.* 11, 950–956.
- Brown, K., Selfridge, J., Lagger, S., Connelly, J., De Sousa, D., Kerr, A., Webb, S., Guy, J., Merusi, C., Koerner, M.V., and Bird, A. (2016). The molecular basis of variable phenotypic severity among common missense mutations causing Rett syndrome. *Hum. Mol. Genet.* 25, 558–570.
- Burns, C.M., Chu, H., Rueter, S.M., Hutchinson, L.K., Canton, H., Sanders-Bush, E., and Emeson, R.B. (1997). Regulation of serotonin-2C receptor G-protein coupling by RNA editing. *Nature* 387, 303–308.
- Collins, A.L., Levenson, J.M., Vilaythong, A.P., Richman, R., Armstrong, D.L., Noebels, J.L., David Sweatt, J., and Zoghbi, H.Y. (2004). Mild overexpression of MeCP2 causes a progressive neurological disorder in mice. *Hum. Mol. Genet.* 13, 2679–2689.



- Cox, D.B.T., Gootenberg, J.S., Abudayyeh, O.O., Franklin, B., Kellner, M.J., Joung, J., and Zhang, F. (2017). RNA editing with CRISPR-Cas13. *Science* **358**, 1019–1027.
- Deverman, B.E., Pravdo, P.L., Simpson, B.P., Kumar, S.R., Chan, K.Y., Banerjee, A., Wu, W.L., Yang, B., Huber, N., Pasca, S.P., and Gradinaru, V. (2016). Cre-dependent selection yields AAV variants for widespread gene transfer to the adult brain. *Nat. Biotechnol.* **34**, 204–209.
- Earley, L.F., Powers, J.M., Adachi, K., Baumgart, J.T., Meyer, N.L., Xie, Q., Chapman, M.S., and Nakai, H. (2017). Adeno-associated Virus (AAV) Assembly-Activating Protein Is Not an Essential Requirement for Capsid Assembly of AAV Serotypes 4, 5, and 11. *J. Virol.* **91**, e01980-16.
- Eggington, J.M., Greene, T., and Bass, B.L. (2011). Predicting sites of ADAR editing in double-stranded RNA. *Nat. Commun.* **2**, 319.
- Fyfe, S., Cream, A., de Klerk, N., Christodoulou, J., and Leonard, H. (2003). InterRett and RettBASE: International Rett Syndrome Association databases for Rett syndrome. *J. Child Neurol.* **18**, 709–713.
- Gadalla, K.K., Bailey, M.E., Spike, R.C., Ross, P.D., Woodard, K.T., Kalburgi, S.N., Bachaboina, L., Deng, J.V., West, A.E., Samulski, R.J., et al. (2013). Improved survival and reduced phenotypic severity following AAV9/MECP2 gene transfer to neonatal and juvenile male Mecp2 knockout mice. *Mol. Ther.* **21**, 18–30.
- Gadalla, K.K.E., Vudhironarit, T., Hector, R.D., Sinnett, S., Bahey, N.G., Bailey, M.E.S., Gray, S.J., and Cobb, S.R. (2017). Development of a Novel AAV Gene Therapy Cassette with Improved Safety Features and Efficacy in a Mouse Model of Rett Syndrome. *Mol. Ther. Methods Clin. Dev.* **5**, 180–190.
- Gao, G.P., Alvira, M.R., Wang, L., Calcedo, R., Johnston, J., and Wilson, J.M. (2002). Novel adeno-associated viruses from rhesus monkeys as vectors for human gene therapy. *Proc. Natl. Acad. Sci. USA* **99**, 11854–11859.
- Garg, S.K., Li, D.T., Cheval, H., McGann, J.C., Bissonnette, J.M., Murtha, M.J., Foust, K.D., Kaspar, B.K., Bird, A., and Mandel, G. (2013). Systemic delivery of MeCP2 rescues behavioral and cellular deficits in female mouse models of Rett syndrome. *J. Neurosci.* **33**, 13612–13620.
- Gaudelli, N.M., Komor, A.C., Rees, H.A., Packer, M.S., Badran, A.H., Bryson, D.I., and Liu, D.R. (2017). Programmable base editing of A•T to G•C in genomic DNA without DNA cleavage. *Nature* **551**, 464–471.
- Goffin, D., Allen, M., Zhang, L., Amorim, M., Wang, I.T., Reyes, A.R., Mercado-Berton, A., Ong, C., Cohen, S., Hu, L., et al. (2011). Rett syndrome mutation MeCP2 T158A disrupts DNA binding, protein stability and ERP responses. *Nat. Neurosci.* **15**, 274–283.
- Heckman, L.D., Chahrouh, M.H., and Zoghbi, H.Y. (2014). Rett-causing mutations reveal two domains critical for MeCP2 function and for toxicity in MECP2 duplication syndrome mice. *eLife* **3**, e02676.
- Hoernes, T.P., Faserl, K., Juen, M.A., Kremser, J., Gasser, C., Fuchs, E., Shi, X., Siewert, A., Lindner, H., Kreutz, C., et al. (2018). Translation of non-standard codon nucleotides reveals minimal requirements for codon-anticodon interactions. *Nat. Commun.* **9**, 4865.
- Källman, A.M., Sahlin, M., and Ohman, M. (2003). ADAR2 A→I editing: site selectivity and editing efficiency are separate events. *Nucleic Acids Res.* **31**, 4874–4881.
- Katrekar, D., Chen, G., Meluzzi, D., Ganesh, A., Worlikar, A., Shih, Y.R., Varghese, S., and Mali, P. (2019). In vivo RNA editing of point mutations via RNA-guided adenosine deaminases. *Nat. Methods* **16**, 239–242.
- Kerr, B., Alvarez-Saavedra, M., Sáez, M.A., Saona, A., and Young, J.I. (2008). Defective body-weight regulation, motor control and abnormal social interactions in Mecp2 hypomorphic mice. *Hum. Mol. Genet.* **17**, 1707–1717.
- Kim, U., Wang, Y., Sanford, T., Zeng, Y., and Nishikura, K. (1994). Molecular cloning of cDNA for double-stranded RNA adenosine deaminase, a candidate enzyme for nuclear RNA editing. *Proc. Natl. Acad. Sci. USA* **91**, 11457–11461.
- Komor, A.C., Kim, Y.B., Packer, M.S., Zuris, J.A., and Liu, D.R. (2016). Programmable editing of a target base in genomic DNA without double-stranded DNA cleavage. *Nature* **533**, 420–424.
- Kudo, S., Nomura, Y., Segawa, M., Fujita, N., Nakao, M., Schanen, C., and Tamura, M. (2003). Heterogeneity in residual function of MeCP2 carrying missense mutations in the methyl CpG binding domain. *J. Med. Genet.* **40**, 487–493.
- Kuttan, A., and Bass, B.L. (2012). Mechanistic insights into editing-site specificity of ADARs. *Proc. Natl. Acad. Sci. USA* **109**, E3295–E3304.
- Licht, K., Hartl, M., Amman, F., Anrather, D., Janisiw, M.P., and Jantsch, M.F. (2019). Inosine induces context-dependent recoding and translational stalling. *Nucleic Acids Res.* **47**, 3–14.
- Li, D.T., Garg, S.K., Monaghan, C.E., Raber, J., Foust, K.D., Kaspar, B.K., Hirrlinger, P.G., Kirchhoff, F., Bissonnette, J.M., Ballas, N., and Mandel, G. (2011). A role for glia in the progression of Rett's syndrome. *Nature* **475**, 497–500.
- Maas, S., Melcher, T., Herb, A., Seeburg, P.H., Keller, W., Krause, S., Higuchi, M., and O'Connell, M.A. (1996). Structural requirements for RNA editing in glutamate receptor pre-mRNAs by recombinant double-stranded RNA adenosine deaminase. *J. Biol. Chem.* **271**, 12221–12226.
- Melcher, T., Maas, S., Herb, A., Sprengel, R., Seeburg, P.H., and Higuchi, M. (1996). A mammalian RNA editing enzyme. *Nature* **379**, 460–464.
- Mendell, J.R., Al-Zaidy, S., Shell, R., Arnold, W.D., Rodino-Klapac, L.R., Prior, T.W., Lowes, L., Alfano, L., Berry, K., Church, K., et al. (2017). Single-Dose Gene-Replacement Therapy for Spinal Muscular Atrophy. *N. Engl. J. Med.* **377**, 1713–1722.
- Merkle, T., Merz, S., Reautschnig, P., Blaha, A., Li, Q., Vogel, P., Wettengel, J., Li, J.B., and Stafforst, T. (2019). Precise RNA editing by recruiting endogenous ADARs with antisense oligonucleotides. *Nat. Biotechnol.* **37**, 133–138.
- Monteleone, L.R., Matthews, M.M., Palumbo, C.M., Thomas, J.M., Zheng, Y., Chiang, Y., Fisher, A.J., and Beal, P.A. (2019). A Bump-Hole Approach for Directed RNA Editing. *Cell Chem. Biol.* **26**, 269–277.e5.
- Montiel-Gonzalez, M.F., Vallecillo-Viejo, I., Yudowski, G.A., and Rosenthal, J.J. (2013). Correction of mutations within the cystic fibrosis transmembrane conductance regulator by site-directed RNA editing. *Proc. Natl. Acad. Sci. USA* **110**, 18285–18290.
- Montiel-González, M.F., Vallecillo-Viejo, I.C., and Rosenthal, J.J. (2016). An efficient system for selectively altering genetic information within mRNAs. *Nucleic Acids Res.* **44**, e157.
- Montiel-Gonzalez, M.F., Diaz Quiroz, J.F., and Rosenthal, J.J.C. (2019). Current strategies for Site-Directed RNA Editing using ADARs. *Methods* **156**, 16–24.
- Neul, J.L., Kaufmann, W.E., Glaze, D.G., Christodoulou, J., Clarke, A.J., Bahi-Buisson, N., Leonard, H., Bailey, M.E., Schanen, N.C., Zappella, M., et al.; RettSearch Consortium (2010). Rett syndrome: revised diagnostic criteria and nomenclature. *Ann. Neurol.* **68**, 944–950.
- Nurpeisov, V., Hurwitz, S.J., and Sharma, P.L. (2003). Fluorescent dye terminator sequencing methods for quantitative determination of replication fitness of human immunodeficiency virus type 1 containing the codon 74 and 184 mutations in reverse transcriptase. *J. Clin. Microbiol.* **41**, 3306–3311.
- O'Connell, M.A., Gerber, A., and Keegan, L.P. (1998). Purification of native and recombinant double-stranded RNA-specific adenosine deaminases. *Methods* **15**, 51–62.
- Picardi, E., and Pesole, G. (2013). REDIttools: high-throughput RNA editing detection made easy. *Bioinformatics* **29**, 1813–1814.
- Rakela, B., Brehm, P., and Mandel, G. (2018). Astrocytic modulation of excitatory synaptic signaling in a mouse model of Rett syndrome. *eLife* **7**, e31629.
- Samaco, R.C., Fryer, J.D., Ren, J., Fyffe, S., Chao, H.T., Sun, Y., Greer, J.J., Zoghbi, H.Y., and Neul, J.L. (2008). A partial loss of function allele of methyl-CpG-binding protein 2 predicts a human neurodevelopmental syndrome. *Hum. Mol. Genet.* **17**, 1718–1727.
- Schneider, M.F., Wettengel, J., Hoffmann, P.C., and Stafforst, T. (2014). Optimal guideRNAs for re-directing deaminase activity of hADAR1 and hADAR2 in trans. *Nucleic Acids Res.* **42**, e87.
- Shahbazian, M.D., Antalffy, B., Armstrong, D.L., and Zoghbi, H.Y. (2002). Insight into Rett syndrome: MeCP2 levels display tissue- and cell-specific differences and correlate with neuronal maturation. *Hum. Mol. Genet.* **11**, 115–124.

Sinnamon, J.R., Kim, S.Y., Corson, G.M., Song, Z., Nakai, H., Adelman, J.P., and Mandel, G. (2017). Site-directed RNA repair of endogenous *Mecp2* RNA in neurons. *Proc. Natl. Acad. Sci. USA* *114*, E9395–E9402.

Sinnett, S.E., Hector, R.D., Gadalla, K.K.E., Heindel, C., Chen, D., Zaric, V., Bailey, M.E.S., Cobb, S.R., and Gray, S.J. (2017). Improved *MECP2* Gene Therapy Extends the Survival of MeCP2-Null Mice without Apparent Toxicity after Intracisternal Delivery. *Mol. Ther. Methods Clin. Dev.* *5*, 106–115.

Skene, P.J., Illingworth, R.S., Webb, S., Kerr, A.R., James, K.D., Turner, D.J., Andrews, R., and Bird, A.P. (2010). Neuronal MeCP2 is expressed at near histone-octamer levels and globally alters the chromatin state. *Mol. Cell* *37*, 457–468.

Sommer, B., Köhler, M., Sprengel, R., and Seeburg, P.H. (1991). RNA editing in brain controls a determinant of ion flow in glutamate-gated channels. *Cell* *67*, 11–19.

Stafforst, T., and Schneider, M.F. (2012). An RNA-deaminase conjugate selectively repairs point mutations. *Angew. Chem. Int. Engl.* *51*, 11166–11169.

Tan, M.H., Li, Q., Shanmugam, R., Piskol, R., Kohler, J., Young, A.N., Liu, K.I., Zhang, R., Ramaswami, G., Ariyoshi, K., et al.; GTEx Consortium; Laboratory, Data Analysis & Coordinating Center (LDACC)—Analysis Working Group; Statistical Methods groups—Analysis Working Group; Enhancing GTEx (eGTEx) groups; NIH Common Fund; NIH/NCI; NIH/NHGRI; NIH/NIMH; NIH/NIDA; Biospecimen Collection Source Site—NDRI; Biospecimen Collection Source Site—RPCI; Biospecimen Core Resource—VARI; Brain Bank Repository—University of Miami Brain Endowment Bank; Leidos Biomedical—Project Management; ELSI Study; Genome Browser Data Integration & Visualization—EBI; Genome Browser Data Integration & Visualization—UCSC Genomics Institute, University of California Santa Cruz (2017). Dynamic landscape and regulation of RNA editing in mammals. *Nature* *550*, 249–254.

Vallecillo-Viejo, I.C., Liscovitch-Brauer, N., Montiel-Gonzalez, M.F., Eisenberg, E., and Rosenthal, J.J.C. (2018). Abundant off-target edits from site-directed RNA editing can be reduced by nuclear localization of the editing enzyme. *RNA Biol.* *15*, 104–114.

Van Esch, H., Bauters, M., Ignatius, J., Jansen, M., Raynaud, M., Hollanders, K., Lugtenberg, D., Bienvenu, T., Jensen, L.R., Gecz, J., et al. (2005). Duplication of the *MECP2* region is a frequent cause of severe mental retardation and progressive neurological symptoms in males. *Am. J. Hum. Genet.* *77*, 442–453.

Vogel, P., Moschref, M., Li, Q., Merkle, T., Selvasarayanan, K.D., Li, J.B., and Stafforst, T. (2018). Efficient and precise editing of endogenous transcripts with SNAP-tagged ADARs. *Nat. Methods* *15*, 535–538.

Wettengel, J., Reautschnig, P., Geisler, S., Kahle, P.J., and Stafforst, T. (2017). Harnessing human ADAR2 for RNA repair - Recoding a PINK1 mutation rescues mitophagy. *Nucleic Acids Res.* *45*, 2797–2808.

Wong, S.K., Sato, S., and Lazinski, D.W. (2001). Substrate recognition by ADAR1 and ADAR2. *RNA* *7*, 846–858.

Wolf, T.M., Chase, J.M., and Stinchcomb, D.T. (1995). Toward the therapeutic editing of mutated RNA sequences. *Proc. Natl. Acad. Sci. USA* *92*, 8298–8302.

Yang, J.H., Sklar, P., Axel, R., and Maniatis, T. (1997). Purification and characterization of a human RNA adenosine deaminase for glutamate receptor B pre-mRNA editing. *Proc. Natl. Acad. Sci. USA* *94*, 4354–4359.

Yang, Y., Kucukkal, T.G., Li, J., Alexov, E., and Cao, W. (2016). Binding Analysis of Methyl-CpG Binding Domain of MeCP2 and Rett Syndrome Mutations. *ACS Chem. Biol.* *11*, 2706–2715.

Yeh, W.H., Chiang, H., Rees, H.A., Edge, A.S.B., and Liu, D.R. (2018). In vivo base editing of post-mitotic sensory cells. *Nat. Commun.* *9*, 2184.

STAR★METHODS

KEY RESOURCES TABLE

| REAGENT or RESOURCE                                                                    | SOURCE                   | IDENTIFIER                         |
|----------------------------------------------------------------------------------------|--------------------------|------------------------------------|
| <b>Antibodies</b>                                                                      |                          |                                    |
| Rat monoclonal anti-HA clone 3F10                                                      | Roche                    | Cat# 11867432001; RRID: AB_2314622 |
| Rabbit monoclonal anti-MeCP2                                                           | Cell Signaling           | Cat# 34456; RRID: AB_2143849       |
| Mouse monoclonal Anti-HA                                                               | Biologend                | Cat# 901514; RRID: AB_2565336      |
| Rabbit polyclonal Anti-Histone H3                                                      | Abcam                    | Cat# Ab1791; RRID: AB_302613       |
| Donkey anti-Rat IgG (H+L) Highly Cross-Adsorbed Secondary Antibody, Alexa Fluor 488    | Thermo Fisher Scientific | Cat# A-21208; RRID: AB_2535794     |
| Donkey anti-Rabbit IgG (H+L) Highly Cross-Adsorbed Secondary Antibody, Alexa Fluor 647 | Thermo Fisher Scientific | Cat# A-31573; RRID: AB_2536183     |
| Goat anti-mouse IgG DyLight IR 680                                                     | Thermo Fisher Scientific | Cat# 35518; RRID: AB_614942        |
| Goat anti-rabbit IgG Dylight IR 800                                                    | Thermo Fisher Scientific | Cat# SA5-10036; RRID:AB_2556616    |
| <b>Chemicals, Peptides, and Recombinant Proteins</b>                                   |                          |                                    |
| TRIzol                                                                                 | Thermo Fisher Scientific | Cat# 15596026                      |
| Poly(L) lysine hydrobromide                                                            | Sigma Aldrich            | Cat# P2636                         |
| 2,2,2-tribromoethanol                                                                  | Sigma Aldrich            | Cat# T48402                        |
| 4',6'-diamidino-2-phenylindole (DAPI)                                                  | Thermo Fisher Scientific | Cat# D1306                         |
| <b>Critical Commercial Assays</b>                                                      |                          |                                    |
| SMARTer RNA kit                                                                        | Clontech                 | Cat# 634940                        |
| Seq-Cap Exome Plus capture kit                                                         | Roche                    | Cat# 06740189001                   |
| KAPA Library Quantification kit                                                        | Roche                    | Cat# 7960140001                    |
| NucleoBond Xtra Maxi Endotoxin Free Kit                                                | Takara Bio               | Cat # 740424.10                    |
| RNeasy Micro kit                                                                       | QIAGEN                   | Cat# 74004                         |
| Pierce BCA Protein Assay Kit                                                           | Thermo Fisher Scientific | Cat# 23225                         |
| Invitrogen SuperScript III First-Strand Synthesis System                               | Thermo Fisher Scientific | Cat# 18080051                      |
| QIAquick gel extraction kit                                                            | QIAGEN                   | Cat# 28706                         |
| Agilent RNA 6000 Pico Kit                                                              | Agilent                  | Cat# 5067-1513                     |
| PureLink Genomic DNA Isolation kit                                                     | Thermo Fisher Scientific | Cat# K182001                       |
| Lipofectamine 2000 Transfection Reagent                                                | Thermo Fisher Scientific | Cat# 11668019                      |
| <b>Deposited Data</b>                                                                  |                          |                                    |
| Whole transcriptome RNA-seq                                                            | This paper               | SUB7012760                         |
| Whole exome sequencing                                                                 | This paper               | SUB7012760                         |
| <b>Experimental Models: Cell Lines</b>                                                 |                          |                                    |
| HEK293 Cells (AAV-293)                                                                 | Agilent                  | cat# 240073; RRID: CVCL_6871)      |
| Neuro-2A Cells (N2A)                                                                   | ATCC                     | Cat# CCL-131; RRID: CVLCL-0470     |
| <b>Experimental Models: Organisms/Strains</b>                                          |                          |                                    |
| <i>Mecp2</i> <sup>317G &gt; A</sup> ; C57BL/6J mice                                    | Sinnamon et al., 2017    | NA                                 |
| C57BL/6J                                                                               | The Jackson Laboratory   | JAX Stock 000664                   |
| <b>Oligonucleotides</b>                                                                |                          |                                    |
| Guide sequences; see Table S1                                                          | This paper               | NA                                 |
| PCR and sequencing primers; see Table S1                                               | This paper               | NA                                 |
| Primers for cloning of pGM1267; see Table S1                                           | This paper               | NA                                 |
| <b>Recombinant DNA</b>                                                                 |                          |                                    |
| Plasmid: P5E18-VD2/9                                                                   | Gao et al., 2002         | NA                                 |

(Continued on next page)

**Continued**

| REAGENT or RESOURCE                              | SOURCE                                                                                                                                      | IDENTIFIER           |
|--------------------------------------------------|---------------------------------------------------------------------------------------------------------------------------------------------|----------------------|
| Plasmid: PHP.B 7-mer peptide coding DNA sequence | <a href="#">Deverman et al., 2016</a>                                                                                                       | NA                   |
| Plasmid: pGM1258                                 | <a href="#">Sinnamon et al., 2017</a>                                                                                                       | NA                   |
| Plasmid: pGM1186                                 | <a href="#">Sinnamon et al., 2017</a>                                                                                                       | NA                   |
| Plasmid: pGM1108                                 | <a href="#">Sinnamon et al., 2017</a>                                                                                                       | NA                   |
| Plasmid: pGM1267                                 | This paper                                                                                                                                  | NA                   |
| <b>Software and Algorithms</b>                   |                                                                                                                                             |                      |
| ImageJ, Version 1.60_65 (32bit)                  | <a href="https://imagej.nih.gov/ij/">https://imagej.nih.gov/ij/</a>                                                                         | RRID: SCR_003070     |
| Bioedit Software Package                         | <a href="https://bioedit.software.informer.com/7.2/">https://bioedit.software.informer.com/7.2/</a>                                         | RRID: SCR_007361     |
| Zen Digital Imaging Software                     | Zeiss                                                                                                                                       | RRID: SCR_013672     |
| Bwa-mem 0.7.17                                   | <a href="http://bio-bwa.sourceforge.net">http://bio-bwa.sourceforge.net</a>                                                                 | RRID: SCR_010910     |
| Bowtie 1.2.2.                                    | <a href="https://sourceforge.net/projects/bowtie-bio/files/bowtie/1.2.2">https://sourceforge.net/projects/bowtie-bio/files/bowtie/1.2.2</a> | RRID: SCR_005476     |
| REDItolDNARNA                                    | <a href="#">Picardi and Pesole 2013</a>                                                                                                     | RRID: SCR_012133     |
| Graph Pad Prism 6.0e                             | Graph Pad                                                                                                                                   | RRID: SCR_002798     |
| <b>Other</b>                                     |                                                                                                                                             |                      |
| Tissue Freezing Medium                           | Electron Microscopy Sciences                                                                                                                | Cat# 72592           |
| Pen 1.0 membrane slides                          | Zeiss                                                                                                                                       | Cat# 415190-9041-000 |
| ProLong Gold Antifade Mountant                   | Thermo Fisher Scientific                                                                                                                    | Cat# P36934          |
| Normal Donkey Serum                              | Jackson Immunoresearch Labs                                                                                                                 | Cat# 017-00-001      |

**RESOURCE AVAILABILITY**

**Lead Contact**

Further information and requests for resources and reagents should be directed to the lead contact, Gail Mandel ([mandelg@ohsu.edu](mailto:mandelg@ohsu.edu))

**Materials Availability**

Reagents generated in this study are available from the Lead Contact with the completion of a Materials Transfer Agreement.

**Data and Code Availability**

RNA-seq and exome sequencing data files have been uploaded to the Sequencing Read Archive (SUB7012760).

**EXPERIMENTAL MODEL AND SUBJECT DETAILS**

**Animal studies**

All animal procedures were approved by the Oregon Health and Science University Institutional Animal Care and Use Committee. Mice were housed with littermates on a 12:12 light/dark cycle. The generation of *Mecp2*<sup>317G > A</sup> mice and genotyping protocols have been described previously ([Sinnamon et al., 2017](#)).

**Cell lines**

Human embryonic kidney HEK293 cells (AAV-293, Agilent, cat# 240073; RRID: CVCL\_6871) were grown in Dulbecco's Modified Eagle's Medium (DMEM, Lonza, cat# BE12-614F) supplemented with 10% fetal bovine serum (FBS), L-glutamine and penicillin-streptomycin. Mouse neuro-2A cells (ATCC, cat# CCL-131; RRID: CVLCL-0470, were grown in DMEM (Thermo Scientific, cat # 11965092) supplemented with 10% FBS. All cell lines were kept at 37°C in a 5% CO<sub>2</sub> humidified incubator.

**METHOD DETAILS**

**Plasmid constructs**

The creation of the plasmids containing the AAV vector genomes that were used for AAV vector production (pGM1258, pGM1186) was described previously ([Sinnamon et al., 2017](#)). Plasmid pGM1267 was generated by removing the six copies of the human

*U6* promoter and *Mecp2* guide sequences from pGM1258 by restriction digest (NdeI/ApaI) and adding a single copy of the human *U6* promoter and *Mecp2* guide between these two sites. The single human *U6-Mecp2* guide sequence was generated by PCR amplification from pGM1108 (Sinnamon et al., 2017) using primers to add NdeI/ApaI restriction sites. The guide sequences and the cloning primers are shown in Table S1. Plasmid DNA to generate viral vectors was prepared using the NucleoBond Xtra Maxi endotoxin free kit (Takara Bio, cat # 740424.10) prior to production. The AAV helper plasmid expressing the AAV2 Rep proteins and the AAV-PHP.B capsid protein (i.e., the AAV-PHP.B helper plasmid) is a derivative of the AAV9 helper plasmid, p5E18-VD2/9 (Gao et al., 2002) and was constructed by inserting a PHP.B 7-mer peptide-coding DNA sequence (Deverman et al., 2016) into the wild-type AAV9 capsid protein open-reading frame between the amino acid positions 588 and 589.

### AAV vectors

AAV vectors used in the study were produced in human embryonic kidney HEK293 cells (AAV-293, Agilent, RRID: CVCL\_6871) by an adenovirus-free plasmid transfection method and purified by two rounds of cesium chloride (CsCl) density-gradient ultracentrifugation followed by dialysis as described elsewhere (Earley et al., 2017). To package AAV vector genome in the AAV.PHP.B capsids, we used the AAV-PHP.B helper plasmid as described above. The purified AAV vectors were in PBS with 5% sorbitol (w/v) and 0.001% Pluronic F-68 (v/v). The titer of each AAV vector was determined using quantitative dot blot using a probe generated against the Ecdysase-coding sequence.

### Stereotaxic injections

P28-P35 *Mecp2*<sup>317G>A</sup> and wild-type male mice were deeply anesthetized with 4% isoflurane (v/v) and stabilized in a custom stereotaxic apparatus, modified from a David Kopf system. After being placed in the apparatus, mice were kept under 2% isoflurane (v/v) for the remainder of the surgery. A dental drill was used to make holes in the skull and each hippocampal hemisphere was injected using a pulled glass micropipette (diameter 10–15  $\mu$ m) backfilled with AAV. Injections were made at the following coordinates relative to Bregma: medial-lateral (ML): 1.40 mm, anterior-posterior (AP): 1.50 mm at depths of 1.50 and 1.65 mm; ML: 1.75 mm and AP: 2.25 mm at depths of 1.75 mm and 2.00 mm. At each location  $2.75 \times 10^9$  viral genomes of virus were delivered. Following injections animals were allowed to recover on a heated pad prior to being returned to their home cage.

### Laser capture microdissection

Three weeks after stereotaxic injection, *Mecp2*<sup>317G>A</sup> mice were anesthetized by intraperitoneal injection of 2,2,2-tribromoethanol (Sigma Aldrich, cat# T48402) and sacrificed by decapitation. Whole brains were washed in ice cold phosphate buffered saline (PBS), embedded in Tissue Freezing Medium (Electron Microscopy Sciences, cat: #72592) and stored at  $-80^\circ\text{C}$ . Sagittal sections (12  $\mu$ m) were cut at  $-25^\circ\text{C}$  using a cryostat and loaded on poly (L) lysine (Sigma Aldrich, cat# P2636) coated PEN 1.0 membrane slides (Zeiss, cat #415190-9041-000). Immediately after sectioning, slides were fixed in 70% ethanol, stained with an abbreviated hematoxylin staining protocol, and stored at  $-80^\circ\text{C}$ . Pyramidal cells from the CA1 and CA3 regions of the hippocampus along with dentate granule neurons were isolated for RNA analysis and cerebellar tissue was isolated for whole-exome sequencing using the Zeiss Palm Microbeam system.

### Sanger sequencing analysis

Whole hippocampal tissue and laser captured hippocampal fields were isolated from male mice three weeks post stereotaxic injection. Total RNA from intact hippocampal tissue was isolated using Trizol reagent (Thermo Fisher Scientific, cat#15596026) according to the manufacturer's instructions. RNA was isolated from laser captured cell populations using the RNeasy Micro kit (QIAGEN, Cat# 74004) according to the manufacturer's instructions. All samples were tested for RNA purity using a Bioanalyzer 2100 and the Agilent RNA 6000 pico kit (Agilent, cat# 5067-1513). All samples had integrity scores of  $> 8.5$ . RNA was reverse transcribed using the SuperScript III First-Strand Synthesis System (Invitrogen, cat# 18080051) and primed using oligo dT. Endogenous *Mecp2* cDNA was amplified for analysis using a forward primer in the 5' untranslated region and a reverse primer located in the 3' untranslated region PCR products were fractionated on a 1% agarose gel and purified using the QIAquick gel extraction kit (QIAGEN, cat# 28706) before being submitted for Sanger sequence analysis. Sanger sequencing was performed using an Applied Biosystems 3730xl 96-capillary DNA analyzer. All primers are listed in Table S1. The C/T peak heights of the antisense strand were quantified from the resulting four-dye-trace sequences using the Bioedit software package ([www.mbio.ncsu.edu/BioEdit/bioedit.html](http://www.mbio.ncsu.edu/BioEdit/bioedit.html); RRID: SCR\_007361) as previously described (Eggington et al., 2011; Sinnamon et al., 2017).

Quantification of editing rates was performed using the antisense strand because A/G peaks have more inconsistent heights (Nurpeisov et al., 2003). All chromatographs in the figures are shown as the reverse complement to show the mixed peaks at the target adenosine.

### Whole transcriptomic analysis

cDNA libraries were made by the OHSU Massively Parallel Sequencing Shared Resource using the SMARTer RNA kit (Clontech, cat# 63490). Library quality was assessed using a TapeStation 220 and libraries were quantified by qPCR using a KAPA Library Quantification kit (Roche, cat# 7960140001). Libraries were sequenced using 100-cycle paired-end runs on a HiSeq 2500. Whole genomic DNA was isolated from laser captured samples using a PureLink genomic DNA mini kit (Thermo Fisher Scientific, cat# K182001) and

quantified using a TapeStation 220. Libraries were made from 50 ng of genomic DNA using a Seq-Cap Exome Plus capture kit (Roche, cat# 06740189001) and quantified by qPCR using a KAPA Library Quantification kit. Exome libraries were then sequenced using 100-cycle single-read runs on a HiSeq 2500.

Whole exome DNA sequencing results were aligned to the C57BL/6J reference genome using Bwa-mem 0.717 (RRID: SCR\_010910). The RNA-seq results were aligned to the mm10 reference genome using Bowtie 1.2.2 (RRID: SCR\_005476). Single nucleotide polymorphisms (SNPs) were defined as DNA sample calls, which had < 99% of the reads aligning to the reference nucleotide across all sequenced samples and were excluded from downstream analysis.

RNA editing events were identified by comparing the adenosine or thymine nucleotides from the reference DNA sequence to the RNA sequencing results using the REDIttoolDnaRna workflow (Picardi and Pesole, 2013, RRID: SCR\_012133) with the following parameters:

- e,E exclude multihits for RNA-Seq, DNA-Seq
- d, D exclude duplicates for RNA-Seq, DNA-Seq
- p User pair concordant reads only (for RNA-Seq only)
- u, U Consider mapping quality for RNA-Seq, DNA-Seq
- m 20,20 Minimum mapping quality score for RNA-Seq, DNA-Seq
- a,A6-0 Trim 6 bases up and 0 bases down per read for RNA-Seq, DNA-Seq
- l,L Remove substitutions in homopolymeric regions
- v1 Minimum number of reads supporting variation
- n 0.0 Minimum editing frequency for RNA-Seq, DNA-Seq

To be considered for further analysis, an editing event had to be present in all three biological replicates from each sample type (non-targeting guide and targeting guide) but not present in the non-injected controls.

### Immunostaining

Mice were anesthetized by intraperitoneal injection of 2,2,2-tribromoethanol (Sigma Aldrich, cat# T48402) and sacrificed by transcardial perfusion of PBS, followed by 4% depolymerized paraformaldehyde. Brains were removed and equilibrated in 30% sucrose overnight at 4°C before being embedded in Tissue Freezing Medium (Electron Microscopy Sciences, cat #72592) and stored at -80°C. Sagittal sections (14 μm) were cut at -20°C using a cryostat and stored at -20°C. Sections underwent antigen retrieval with -20°C acetone for 8 minutes followed by washes with water and PBS before treatment with boiling citrate buffer (10 mM sodium citrate, 0.1% Tween-20, pH 6.0) for 10 minutes. Sections were cooled to room temperature (RT) and incubated in blocking buffer containing PBST (0.01% Triton X-100 in PBS, pH 7.4) and 10% normal donkey serum (Jackson ImmunoResearch labs, cat# 017-00-001) for 30 minutes at RT. Sections were incubated overnight at 4°C with rabbit anti-MeCP2 (rabbit mab D4F3, Cell Signaling, cat# 34456, 1:500) and rat anti-HA (rat mab 3F10; Roche cat# 1867432991, 1:200) antibodies diluted in blocking buffer.

Sections were washed 3x with PBST and incubated for 1 hour at RT with Alexa Fluor secondary antibodies (Thermo Fisher Scientific, donkey anti-rat 488 (cat# A-31573) and donkey anti-rabbit 647 (cat# A-31573), 1:500) diluted in blocking buffer. Sections were washed 3x with PBST, then washed again with PBS before being incubated with 300 nM 4',6-diamidino-2-phenylindole (DAPI, Thermo Scientific, cat# D1306) in PBS for 20 minutes. After a final wash in PBS, sections were mounted using ProLong Gold antifade mountant (Thermo Fisher Scientific, cat# 936934), which was allowed to cure overnight.

### Image Acquisition and Analysis

A Zeiss 710 laser scanning confocal microscope equipped with a 63x Plan-Apo objective and Zen Digital Imaging Software (Zeiss, RRID:SCR\_013672) was used to acquire sequential 1 μm optical sections for creation of Z stack images. The field size corresponded to 18211.5 μm<sup>2</sup> with a resolution of 1024x1024 pixels. Fluorescence images corresponding to HA label (488 laser), MeCP2 label (633 nm laser) and DAPI (405 nm laser) were sequentially acquired. For each, the laser strength was set to sub-saturating levels corresponding to 0 to 255. These acquisition settings were then applied to all samples. The fraction of HA immuno-labeled cells was determined by counting the fraction of DAPI positive nuclei that were also HA positive. Cells were determined to be HA positive if the fluorescence intensity was above non-injected controls. At least 100 cells were counted in each region of the hippocampus (CA1, CA3 and dentate gyrus) for each mouse using the ImageJ cell counter plugin (National Institutes of Health; [imagej.nih.gov/ij/](http://imagej.nih.gov/ij/), version 1.60\_65 (32bit), RRID: SCR\_003070) and two *Mecp2*<sup>317G>A</sup> mice were analyzed for each viral condition. As a proxy for the ability of MeCP2 to bind DNA, the MeCP2 intensity in pericentromeric heterochromatic foci was determined. Once again, the laser strengths for MeCP2 and DAPI were adjusted individually to fall within a non-saturating 0-255 range and the acquisition parameters were held constant for all subsequent measurements. Regions of heterochromatin selected for measurement were based on both size (≥ 0.3 μm<sup>2</sup>) and average intensity (≥ 80 on a scale of 0 to 255). Using ImageJ, the corresponding MeCP2 fluorescence intensity for 4 to 6 heterochromatic foci per cell was determined on the basis of 4 × 4 pixel ROIs. These values were then used to generate the average intensity value for each cell. For each of two animals, 20 cell averages were generated for each of 3 regions of the hippocampus (CA1, CA3 and dentate gyrus). This process was repeated for both viral conditions (wild-type non-injected, *Mecp2*<sup>317G>A</sup> targeting guide, *Mecp2*<sup>317G>A</sup> non-targeting guide). The resultant amplitude distributions (n = 40 cells per condition) were subject to statistical comparison using a Kruskal-Wallis test followed

by a Dunn's multiple comparisons test. Further, for each hippocampal region the variance of MeCP2 fluorescence intensity for each condition was subject to statistical testing using an F-test for equality of variances.

### Transient Transfections and Cell Culture

Neuro2A cells (ATCC CCL-131) were maintained in DMEM (Thermo Fisher Technologies, cat # 11965092) in 10% FBS at 37°C in a 5% CO<sub>2</sub> humidified incubator. For analysis of Editase protein expression, cells were seeded at a density of 1.25x10<sup>5</sup> cells per well of a 12-well plate. After 24 h, cells were transfected with 1 μg of plasmid DNA containing the human *Synapsin I* promoter expressing Editase and six copies of the *Mecp2* targeting guide (pGM1258), one copy of the *Mecp2* targeting guide (pGM1267) or one copy of the non-targeting guide (previously referred to as Editase alone, pGM1186). Plasmid DNA was transfected using a 2:1 ratio of Lipofectamine 2000 transfection reagent (Thermo Fisher Scientific, cat#11668019) and DNA in Opti-MEM reduced serum media (Thermo Fisher Scientific, cat# 31985062).

### Western Blotting

Transfected Neuro2A cells were lysed 72 hr after transfection using 100 μL of whole-cell lysis buffer (25 mM Tris, pH 7.6, 150 mM NaCl, 1% Igepal CA-630 (Sigma, cat# I8896), 1% deoxycholate, 0.1% SDS, protease inhibitor (Complete EDTA-free; Roche, cat # 11836170001), 1 mM beta-mercaptoethanol, and 250 units per mL Benzamide hydrochloride (Sigma-Aldrich, cat# E1014). Lysates were centrifuged at 16,000 × *g* for 10 min at 4°C and the soluble fraction isolated. Protein concentrations from the soluble fraction were measured using the Pierce BCA protein assay (Thermo Fisher Scientific, cat# 23225). 20 μg of protein lysate per sample was separated on NuPage 4%–12% Bis-Tris gels (Thermo Fisher Scientific, cat# NP0335BOX) in NuPAGE MES-SDS running buffer (Thermo Fisher Scientific, cat# NP002), and transferred onto a nitrocellulose membrane (GE Healthcare Life Sciences, cat# 45004001). Membranes were blocked with 3% bovine serum albumin in 1 × TBST (TBS with 0.05% Tween 20) for 1 h, then incubated with mouse anti-HA (1:1000, Biolegend, cat# 901514, RRID: AB\_2565336) and rabbit anti-Histone H3 (1:5000, Abcam, Cat# Ab1791; RRID: AB\_302613) overnight at 4°C. After washing three times with 1 × TBST, blots were incubated with goat anti-mouse IgG DyLight 680 (1:10,000 dilution; Thermo Scientific, cat# 33518) and goat anti-rabbit IgG DyLight 800 (1:10,000 dilution; Thermo Scientific, cat# 33571) diluted in 3% BSA in 1xTBST for 1 h. Blots were imaged and quantified using the Odyssey Imaging System (LI-COR Biosciences).

### QUANTIFICATION AND STATISTICAL ANALYSIS

All statistical tests with the exception of the whole transcriptome analysis were performed using GraphPad Prism version 6.0e software (RRID: SCR\_002798). The rate of A-to-I editing from whole hippocampal samples was compared between viral conditions using an unpaired *t* test and within isolated neuronal populations using one-way ANOVA followed by Tukey's post hoc multiple comparisons tests. Western blots comparing the level of Editase protein and the number of RNA-seq reads aligning to the Editase coding sequence were compared using unpaired two-tailed *t* tests. The level of MeCP2 fluorescence in heterochromatic foci was compared within hippocampal regions using a Kruskal-Wallis test followed by a Dunn's post hoc multiple comparisons test. The variance of MeCP2 fluorescence intensity was subjected to testing using an F-test for equality of variances. All experimental results are expressed as the mean ± the standard deviation.

Cell Reports, Volume 32

## Supplemental Information

### ***In Vivo* Repair of a Protein Underlying a Neurological Disorder by Programmable RNA Editing**

**John R. Sinnamon, Susan Y. Kim, Jenna R. Fisk, Zhen Song, Hiroyuki Nakai, Sophia Jeng, Shannon K. McWeeney, and Gail Mandel**



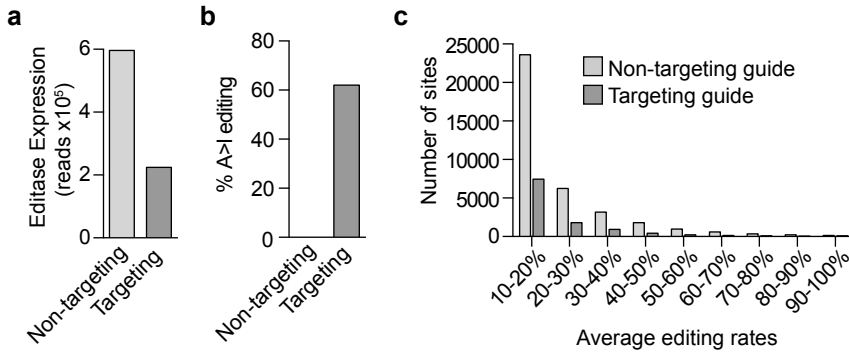

Supplementary Figure 1. Whole transcriptomic RNA-seq analysis of the same RNA used in our published study (Sinnamon et al., 2017) of *Mecp2*<sup>317G>A</sup> hippocampal neurons (DIV14), 7 days following transduction with AAV1/2 virus. Related to Figure 3. Promoters, Editase and guide sequences are identical to that shown in Figure 1a in this study. a) The number of RNA-seq reads that aligned to the Editase coding sequence for each viral condition. b) Histogram showing that on-target editing is guide-dependent. One sample each condition. c) Histogram showing the number of off-target editing sites, binned according to the editing rates.

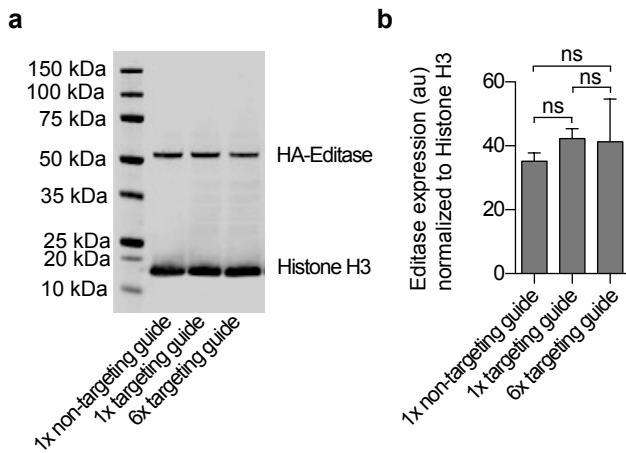

Supplementary Figure 2. The number of copies of the human U6 promoter driving guide expression does not influence Editase protein expression. Related to Figure 3. a), Representative immunoblot of whole cell lysates prepared from Neuro-2A neuroblastoma cells 72 hours after transfection with plasmids containing the Editase cDNA expressed from the human *Synapsin I* promoter and indicated guides. Blots were probed with anti-HA antibody for Editase detection and anti-Histone H3 for loading control. b) Quantification of Editase expression from immunoblots (mean  $\pm$  SD, n = 3 biological replicates), each condition normalized to Histone H3. au, arbitrary units. ns, not significant by One-way ANOVA and Tukey's multiple comparisons test.

Supplementary Table 1. Guide and primer sequences. Related to STAR Methods

**Guide sequences**

mouse *Mecp2*<sup>317G>A</sup> 2xBoxB Targeting guide  
Non-targeting guide

**Sequence, 5'→ 3'**

cagacttctggccctgaaaaagggccttaagcttccgggtccaaccttcaggcaggccctgaaaaagggcctggggcatc  
gaagagcgagctcttctgttttagagctagaaatagcaagtataaataaggctagtcggtatcaactgaaaaagtggcaccgagtcggtgc

**Amplification of endogenous *Mecp2* cDNA**

mouse *Mecp2*-14 ATG Fwd  
mouse *Mecp2*-3'UTR+92 Rev

aaccggtccggaaaatggcc  
ggaagctttgtcagagccctaccataag

**Sequencing primers for *Mecp2* RT-PCR**

mouse *Mecp2* 554 Rev  
mouse *Mecp2* 914 Rev  
mouse *Mecp2* 1122 Rev  
mouse *Mecp2*-3'UTR+92 Rev

ctcctggaggggctcccttc  
gaccgatggaagactcctca  
actgctgtgcgccctt  
ggaagctttgtcagagccctaccataag

**Cloning primers**

Human U6 NdeI Fwd  
mouse *Mecp2* 2xBoxB Targeting guide Rev

gtgtcatatgcttaccgtaactgaaag  
cacagggcccaaaaagatgacccaggccct

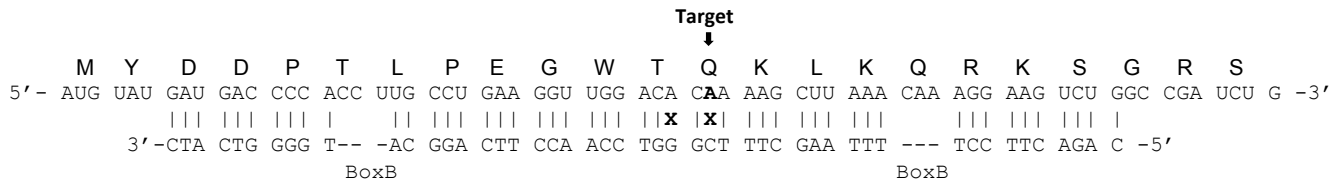

| <b>Mecp2<sup>317G&gt;A</sup></b> | <b>Replicate</b> | <b>Injection Condition</b>               | E102G | E102E | T105A | T105T | <b>Target<br/>R106Q</b> |
|----------------------------------|------------------|------------------------------------------|-------|-------|-------|-------|-------------------------|
|                                  | 1                | 6xU6-Mecp2 targeting guide-hSynI Editase | 6.5%  | 22.6% | 8.2%  | 6.4   | 39.4%                   |
|                                  | 2                | 6xU6-Mecp2 targeting guide-hSynI Editase | 9.2%  | 31.0% | 12.7% | 8.6   | 57.9%                   |
|                                  | 3                | 6xU6-Mecp2 targeting guide-hSynI Editase | 7.1%  | 23.4% | 10.0% | 6.9   | 49.7%                   |
| <br>                             |                  |                                          |       |       |       |       |                         |
| <b>Wild-type</b>                 | <b>Replicate</b> | <b>Injection Condition</b>               | E102G | E102E | T105A | T105T |                         |
|                                  | 1                | 6xU6-Mecp2 targeting guide-hSynI Editase | 5.8%  | 14.4% | 6.2   | 6.7   |                         |

Supplementary Table 2. Editing of adenosines within *Mecp2* RNA identified in intact hippocampus by Sanger sequencing analysis. Related to Table 1. *Top*, *Mecp2* RNA and deduced primary amino acid sequence (top row) relative to the guide RNA (bottom row). The target adenosine, *Mecp2*<sup>317</sup> in the RNA strand (MeCP2 R106Q) is bolded. X, mismatched adenosines. *Bottom*, Rates of editing at the adenosines located within the guide region from intact hippocampus for each biological replicate. The detection limit for this assay was previously determined to be 5% editing (Sinnamon et al., 2017). Any sites that had ≤ 5% editing are listed as having no detectable editing (ND). There was no detectable editing in *Mecp2* RNA outside of the guide region.
